# Supplementary material
Source: publisher figshare collection journal article supplement (https://gsapubs.figshare.com/ndownloader/files/22740482)
Supplement: Supplementary file 1 [file 22740482]

**Table 1: Common Facies and Processes**

| <b>Facies</b>                                                 | <b>Grain Size</b>                                                                  | <b>Bed Thickness (meters)</b>        | <b>Structures/Textures</b>                                                                                                                                                                                                              |
|---------------------------------------------------------------|------------------------------------------------------------------------------------|--------------------------------------|-----------------------------------------------------------------------------------------------------------------------------------------------------------------------------------------------------------------------------------------|
| <b>1: Chaotic facies</b><br>(see Table 2)                     | Small-scale<br>slumps to 100 m<br>glide blocks                                     | 0.025-180                            | See Table 2                                                                                                                                                                                                                             |
| <b>2: Conglomerate/<br/>pebbly sandstone</b><br>(see Table 3) | Chiefly pebble,<br>boulders rare;<br>mud or medium<br>to coarse sand<br>matrix     | 0.5-20                               | See Table 3                                                                                                                                                                                                                             |
| <b>3: Nongraded<br/>sandstone</b>                             | Fine to coarse<br>sand, chiefly<br>medium sand;<br>locally pebbly                  | 0.4-5                                | Structureless (massive) to<br>poorly laminated; rarely<br>with dish structures                                                                                                                                                          |
| <b>4: Graded<br/>sandstone</b>                                | Fine to coarse<br>sand; mainly fine<br>to medium sand;<br>locally with<br>granules | 0.05-10; 0.15-<br>0.4 most<br>common | Basal scour; graded, most<br>commonly structureless or<br>planar laminate (commonly<br>at shallow inclinations), or<br>divided into structureless<br>base and planar laminated<br>upper part; uppermost part<br>rarely ripple-laminated |

**Table 1: Continued**

| <b>Facies</b>                                         | <b>Interpretation</b>                                                                                                                                                                     | <b>Lowe (1982)</b> | <b>Pickering and others (1986)</b> |
|-------------------------------------------------------|-------------------------------------------------------------------------------------------------------------------------------------------------------------------------------------------|--------------------|------------------------------------|
| <b>1: Chaotic facies (see Table 2)</b>                | Disorganized units resulting from a variety of soft-sediment failure/transport mechanisms including block-gliding, block-slumping, slump-folding, and loading; includes rockfall deposits | ..                 | F1.1, F2.1, F2.2                   |
| <b>2: Conglomerate/pebbly sandstone (see Table 3)</b> | Mainly deposition from high-density, gravelly, sediment-gravity flows, and the current reworked deposits of those flows                                                                   | See Table 3        | A1.1, A1.2, A2.1-A2.8, B2.2        |
| <b>3: Nongraded sandstone</b>                         | Rapid sedimentation from high-density turbidity currents or other high-density, cohesionless sediment-gravity flow; post-depositional modification by liquefaction\fluidization possible  | S3(?)              | B1.1                               |
| <b>4: Graded sandstone</b>                            | Deposition from waning, high-density, turbidity currents                                                                                                                                  | Ta, Tb, Tab, Tabc  | C2.1, C2.2                         |

**Table 1: Continued**

| <b>Facies</b>                                                             | <b>Grain Size</b>      | <b>Bed Thickness (meters)</b>     | <b>Structures/Textures</b>                                                                                                                                                                                                                                  |
|---------------------------------------------------------------------------|------------------------|-----------------------------------|-------------------------------------------------------------------------------------------------------------------------------------------------------------------------------------------------------------------------------------------------------------|
| <b>5a: Thinly interbedded graded sandstone and mudstone</b>               | Mud to fine sand       | Sand: 0.01-0.2;<br>Mud: 0.01-1    | Sand: basal scour; commonly graded; range from structureless to various combinations of planar laminations and ripple laminations. Mud: parallel-laminated mudstone, rippled siltstone layers or starved sand ripples; bioturbation common, but not extreme |
| <b>5b: Thinly interbedded ripple laminated sandstone and mudstone</b>     | Mud to coarse sand     | Sand: 0.02-0.4;<br>Mud: 0.01-0.04 | Sand: discontinuous beds with pervasive ripple laminations; thin beds with medium to coarse sand common; Mud: parallel laminated or ripple laminated siltstone; starved ripple horizons ubiquitous                                                          |
| <b>6a: Parallel laminated and ripple laminated siltstone and mudstone</b> | Clay to very fine sand | 0.01- >10                         | Parallel-laminated clay-silt couplets; starved ripples of silt to very fine sand; very small-scale load structures; moderately burrowed                                                                                                                     |
| <b>6b: Parallel laminated mudstone</b>                                    | Clay to very fine sand | 0.01- >10                         | Parallel-laminated clay-silt couplets                                                                                                                                                                                                                       |

**Table 1: Continued**

| <b>Facies</b>                                                             | <b>Interpretation</b>                                                                                                                           | <b>Lowe (1982)</b> | <b>Pickering and others (1986)</b> |
|---------------------------------------------------------------------------|-------------------------------------------------------------------------------------------------------------------------------------------------|--------------------|------------------------------------|
| <b>5a: Thinly interbedded graded sandstone and mudstone</b>               | Sand: deposited from low-density turbidity currents.<br>Mud: deposited from (and reworked by) turbidity current tail; hemipelagic sedimentation | Ta, Tab, Tabc, Tbc | C2.3                               |
| <b>5b: Thinly interbedded ripple laminated sandstone and mudstone</b>     | Reworking of sand and mud by very low density turbidity currents or other dilute flow                                                           | Tc                 | ..                                 |
| <b>6a: Parallel laminated and ripple laminated siltstone and mudstone</b> | Deposition from very dilute turbidity currents and hemipelagic mud; sporadic weak bottom currents rework sediment                               | ..                 | D2.1, D2.2, D2.3, E2.2             |
| <b>6b: Parallel laminated mudstone</b>                                    | Deposition from very dilute turbidity currents and hemipelagic mud                                                                              | ..                 | D2.1, D2.2, D2.3, E2.2             |

**Table 2: Common Chaotic Facies and Processes**

| <b>Chaotic Facies</b>       | <b>Grain Size</b>                                                                                                   | <b>Composition</b>                                                                                                                                                                                    |
|-----------------------------|---------------------------------------------------------------------------------------------------------------------|-------------------------------------------------------------------------------------------------------------------------------------------------------------------------------------------------------|
| <b>1a: Mega-breccia</b>     | Angular blocks as much as 13 m; rounded gravel and sand as matrix; very poorly sorted                               | Indurated blocks derived exclusively from Jurassic units that compose the basin floor                                                                                                                 |
| <b>1b: Slide blocks</b>     | Largest observed is 40 m thick with width and length >100 m                                                         | Coherent, intrabasinal blocks of thinly interbedded graded or ripple-laminated sandstone and silty mudstone                                                                                           |
| <b>1c: Broken formation</b> | Wide range of block sizes, from <1 m to at least 20 m thick and as much as 50 m wide                                | Coherent, intrabasinal blocks bearing facies 5a, 6a, and 6b (Table 1) with varying degrees of ductile deformation.                                                                                    |
| <b>1d: Contorted strata</b> | Sizes range from small <1 m inclusions in sediment-gravity flows to individual slump folds 15 m thick               | A variety of intrabasinal material in the sand to mud size range                                                                                                                                      |
| <b>1e: Pebbly mudstone</b>  | Mudstone with pebbles very common, with angular blocks ranging in size up to 9 m less common, but locally important | Various combinations of pebbles (derived from distant continental arc), angular blocks (derived from Jurassic substrate, homogeneously intermixed with a high proportion of reworked intrabasinal mud |

**Table 2: Continued**

| <b>Chaotic Facies</b> | <b>Deposit Thickness/Geometry</b>                                                                                                                                                  | <b>Occurrence/Distribution</b>                                                                                                                                                                                                                         | <b>Interpretation</b>                                                                                                                                                                                                                                                               |
|-----------------------|------------------------------------------------------------------------------------------------------------------------------------------------------------------------------------|--------------------------------------------------------------------------------------------------------------------------------------------------------------------------------------------------------------------------------------------------------|-------------------------------------------------------------------------------------------------------------------------------------------------------------------------------------------------------------------------------------------------------------------------------------|
| <b>1a:</b>            | 75 m maximum exposed thickness; very lenticular                                                                                                                                    | Occurs only in Pinos Fm. adjacent to Choyal fault; rests within deep scour on Jurassic unconformity                                                                                                                                                    | Large blocks moved by rockfall, or landslide; sparse matrix filled interstices between stacked blocks                                                                                                                                                                               |
| <b>1b:</b>            | Individual blocks reach at least 40 m in thickness and are very tabular; unknown thickness or geometry of aggregate deposit                                                        | Occurs only in Pinos Fm., with increased abundance up-section, especially near the Choyal fault south of Arroyo Coloradito                                                                                                                             | Detachment and translation of coherent slab of slope material                                                                                                                                                                                                                       |
| <b>1c:</b>            | Deposits range from a few meters to at least 180 m in thickness; deposits are broad (100s m to a few km), with marked lateral thickness variability                                | Occurs sporadically throughout the Pinos Fm., but especially abundant on both sides of the Choyal Fault south of Arroyo Coloradito, within 2 km east of the coastline                                                                                  | Translation and tumbling (biaxial rotations) of semi-lithified slump blocks                                                                                                                                                                                                         |
| <b>1d:</b>            | Individual slump layers range in thickness from several cms to 10s m; generally very poor lateral continuity                                                                       | Individual slump layers range in thickness from several cms to 10s m; generally very poor lateral continuity                                                                                                                                           | Gravity-driven soft-sediment deformation during minor to moderate downslope translation                                                                                                                                                                                             |
| <b>1e:</b>            | Pebbly mudstone beds range in thickness from 2 cm to 20 m; lateral continuity is poor in thin beds and unmapped in thicker units; blocky mudstone is laterally mappable for 2-3 km | Sporadic rare mudstone beds throughout the Cretaceous section; significant proportion of u. mudstone unit of Vargas Fm. in headwaters of Gran Cañon; blocky mudstone is abundant in the blocky-olistostrome unit of the Pinos Fm. in Arroyo Coloradito | Debris flow after mixing and homogenization of interstratified gravel and mud by slope failure; channel-wall slumping; incorporation of substrate mud into erosive gravelly flows; blocky mudstone forms as rockfall from uplifted scarps triggers slope failure in muddy substrate |

**Table 3: Common Conglomerate Facies and Processes**

| <b>Conglomerate Facies</b>                                            | <b>Grain Size</b>                                                          | <b>Bed Thickness<br/>(meters)</b> | <b>Structures/Textures</b>                                                                                                                                          |
|-----------------------------------------------------------------------|----------------------------------------------------------------------------|-----------------------------------|---------------------------------------------------------------------------------------------------------------------------------------------------------------------|
| <b>2a: Blocky conglomerate</b>                                        | Gravel: pebbles with rare cobbles and rarer boulders;<br>Blocks: up to 6 m | 1-20 m                            | Clast-supported to matrix-supported; disorganized                                                                                                                   |
| <b>2b: Nongraded conglomerate</b>                                     | Chiefly pebbles                                                            | 0.5-2 m                           | Clast-supported; disorganized                                                                                                                                       |
| <b>2c: Conglomerate or breccia with mud matrix</b>                    | Ranges from granule to boulder; chiefly pebbles                            | 0.5-20 m                          | Clast- supported to matrix-supported; disorganized to moderate a-axis imbrication (when rare, non-equant or discoidal clasts are present)                           |
| <b>2d: Graded, and complexly-graded conglomerate with sand matrix</b> | Chiefly pebbles                                                            | 0.5-7 m                           | Clast-supported to matrix-supported; wide variety of simple and complex grading styles; internal scours and bounding scours abundant                                |
| <b>2e: Gravelly sandstone</b>                                         | Gravel: granules to small pebbles; Sand: medium to coarse, chiefly medium  | 1-15 m                            | Normal grading in gravel fraction; distribution or cyclic grading in sand fraction; granule-lined internal scour surfaces and low-angle cross stratification common |

**Table 3: Continued**

| <b>Conglomerate Facies</b>                                            | <b>Interpretation</b>                                                                                                                                 | <b>Lowe<br/>(1982)</b>                | <b>Pickering and others<br/>(1986)</b> |
|-----------------------------------------------------------------------|-------------------------------------------------------------------------------------------------------------------------------------------------------|---------------------------------------|----------------------------------------|
| <b>2a: Blocky conglomerate</b>                                        | Downslope remobilization of rockfall deposits by highly-competent gravelly sediment-gravity flow                                                      | ..                                    | A1.1                                   |
| <b>2b: Nongraded conglomerate</b>                                     | Rapid deposition by frictional freezing from very high-density, gravelly, sediment-gravity flow, without subsequent reworking by the tail of the flow | ..                                    | A1.1                                   |
| <b>2c: Conglomerate or breccia with mud matrix</b>                    | Gravelly debris flow; imbrication occurs in deposits with low proportion of matrix, where grain interactions were likely                              | ..                                    | A1.2                                   |
| <b>2d: Graded, and complexly-graded conglomerate with sand matrix</b> | Deposition from, and commonly reworking by, surging (?), sand-rich, high-density, gravelly sediment-gravity flow                                      | R2, R2-R3, R3, R2-R3-S1               | A2.2, A2.3, A2.4                       |
| <b>2e: Gravelly sandstone</b>                                         | Deposition from, and commonly reworking by, surging (?), sand-rich, high-density, sediment-gravity flow                                               | S1, R3-S1, R3-S1-S2, S1-S2-(S3?), Tab | A2.5, A2.6, A2.7, A2.8                 |

**Table 3: Continued**

| <b>Conglomerate Facies</b>                                             | <b>Grain Size</b>                            | <b>Bed Thickness<br/>(meters)</b> | <b>Structures/Textures</b>                                                                                               |
|------------------------------------------------------------------------|----------------------------------------------|-----------------------------------|--------------------------------------------------------------------------------------------------------------------------|
| <b>2f: Interstratified<br/>conglomerate and<br/>gravelly sandstone</b> | Chiefly pebbles and medium<br>to coarse sand | 0.5-2 m                           | Clast-supported or<br>matrix-supported,<br>horizontally- and<br>cross-stratified<br>conglomerate and<br>sandstone layers |
| <b>2g: Matrix-poor<br/>conglomerate</b>                                | Pebbles to small boulders                    | 1 m or less                       | Clast-supported,<br>nongraded to<br>normally-graded                                                                      |

**Table 3: Continued**

| <b>Conglomerate Facies</b>                                             | <b>Interpretation</b>                                                                        | <b>Lowe<br/>(1982)</b> | <b>Pickering and others<br/>(1986)</b> |
|------------------------------------------------------------------------|----------------------------------------------------------------------------------------------|------------------------|----------------------------------------|
| <b>2f: Interstratified<br/>conglomerate and<br/>gravelly sandstone</b> | Reworking of gravel and<br>sand beneath strong<br>turbidity currents or other<br>dilute flow | R1-S1                  | A2.1, B2.2                             |
| <b>2g: Matrix-poor<br/>conglomerate</b>                                | Coarse-grained lag deposit<br>left by winnowing of fines<br>beneath turbidity currents       | ..                     | A1.1                                   |
